# Supplementary material
Source: Springer Nature journal article supplement (https://www.springermedizin.de/resource/supplementary/12889_2006_434_MOESM8_ESM.pdf/9500858)

# Perinatal conditions

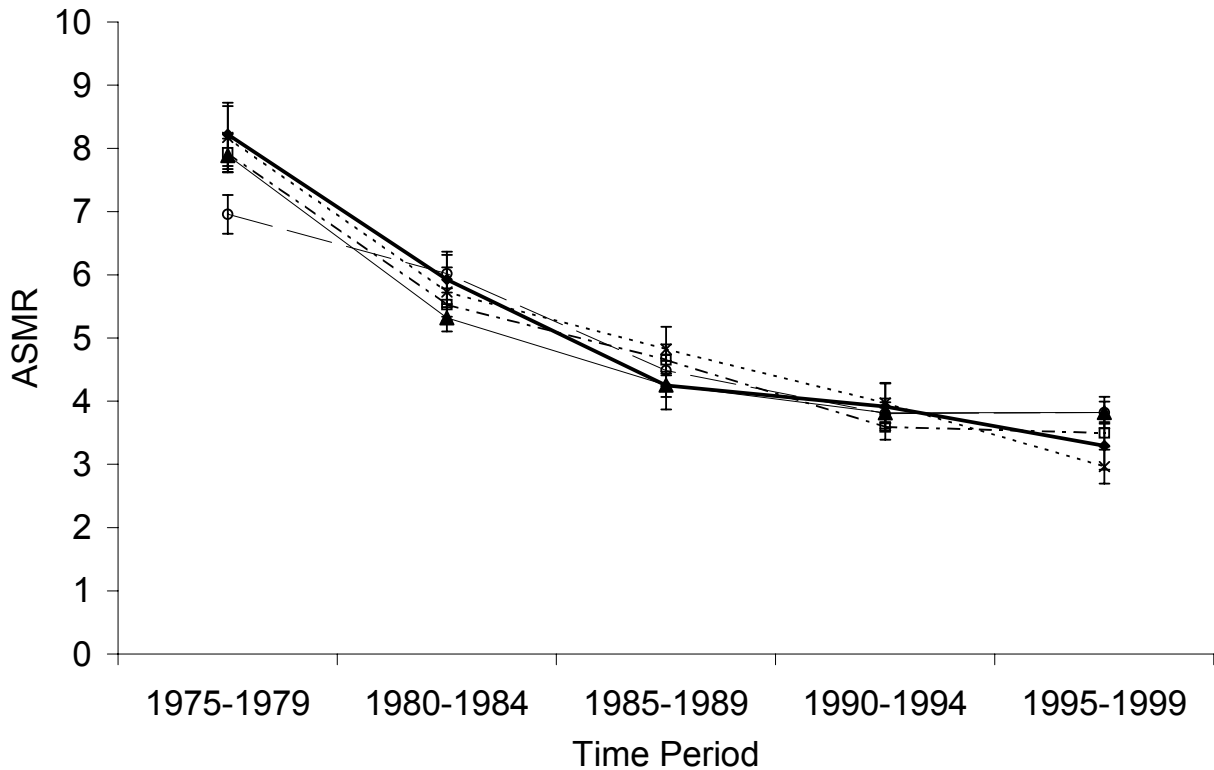

Supplement: MOESM8 [file 9500858]
